# Supplementary material for: diffReps: Detecting Differential Chromatin Modification Sites from ChIP-seq Data with Biological Replicates
Source: PLoS One. 2013 Jun 10;8(6):e65598. doi: 10.1371/journal.pone.0065598 (PMC3677880; doi:10.1371/journal.pone.0065598)
Supplement: Table S3 — Numbers of overlapped genes between transcriptional changes and differential H3K4me3 sites. These numbers are used to derive the statistical significance in Fig. 4 using Fisher’s exact test. (XLSX) [file pone.0065598.s010.xlsx]

## Sheet: Gene Count
The numbers of genes that show transcriptional changes (rows) and differential H3K4me3 modifications (columns)
The numbers of overlaps are shown in the table cells, which were used to derive statistical significance for the heatmap in Fig. 4
diffReps specific category
	Genebody.Down (219)	Genebody.Up (2608)	Promoter.Down (1630)	Promoter.Up (2413)
mRNA.Up (862)	5	116	30	150
mRNA.Down (1665)	15	16	85	13
Promoter (61)	3	14	6	4
Splicing (69)	1	16	10	6
Overlap category
	Genebody.Down (482)	Genebody.Up (1337)	Promoter.Down (1931)	Promoter.Up (677)
mRNA.Up (862)	13	158	6	135
mRNA.Down (1665)	123	13	706	2
Promoter (61)	4	8	16	2
Splicing (69)	1	4	6	3
